# Supplementary material for: Biodiversity of the Genus Trichoderma in the Rhizosphere of Coffee (Coffea arabica) Plants in Ethiopia and Their Potential Use in Biocontrol of Coffee Wilt Disease
Source: MDPI journal article supplement (doi:10.3390/crops2020010), 2022-04-26
Supplement: s1 [file s1]

Table S1. *Trichoderma* species isolated and identified from major coffee growing zones of Ethiopia

| <i>Trichoderma</i> species | Jimma     | Kaffa     | Bench Maji | Shaka     | Buno Bedele | West Wollega | West Guji | Gedio    | Sidama    | Bale     | Total isolates |
|----------------------------|-----------|-----------|------------|-----------|-------------|--------------|-----------|----------|-----------|----------|----------------|
| Soil samples               | 25        | 20        | 23         | 18        | 16          | 14           | 17        | 16       | 21        | 14       | 184            |
| <i>T. asperellum</i>       | 16        | 4         | 6          | 9         | 3           | 9            | 8         | 2        | 5         | 2        | 64             |
| <i>T. asperelloides</i>    | 13        | 2         | 5          | 5         | 1           | 2            | 1         |          | 1         | 2        | 32             |
| <i>T. longibrachiatum</i>  | 4         | 0         | 5          | 4         | 1           | 1            | 1         | 1        | 2         | 1        | 20             |
| <i>T. harzianum</i>        | 4         | 2         | 1          | 0         | 0           | 0            | 0         | 0        | 0         | 1        | 8              |
| <i>T. aethiopicum</i>      | 2         | 2         | 0          | 0         | 0           | 0            | 1         | 0        | 0         | 1        | 6              |
| <i>T. citrinoviride</i>    | 2         | 0         | 0          | 1         | 0           | 0            | 0         | 0        | 0         | 0        | 3              |
| <i>T. hamatum</i>          | 1         | 0         | 1          | 2         | 0           | 0            | 0         | 1        | 1         | 0        | 6              |
| <i>T. reesei</i>           | 1         | 1         | 2          | 0         | 0           | 0            | 0         | 0        | 0         | 0        | 4              |
| <i>T. viride</i>           | 1         | 2         | 0          | 1         | 0           | 0            | 0         | 0        | 0         | 0        | 4              |
| <i>T. bissettii</i>        | 0         | 0         | 0          | 1         | 0           | 0            | 1         | 0        | 1         | 0        | 3              |
| <i>T. brevicompactum</i>   | 0         | 1         | 0          | 1         | 0           | 0            | 0         | 0        | 0         | 1        | 3              |
| <i>T. erinaceum</i>        | 1         | 1         | 0          | 0         | 0           | 0            | 0         | 0        | 0         | 0        | 2              |
| <i>T. gamsii</i>           | 0         | 0         | 1          | 0         | 0           | 1            | 0         | 0        | 0         | 1        | 3              |
| <i>T. koningiopsis</i>     | 1         | 0         | 0          | 1         | 0           | 0            | 0         | 1        | 0         | 0        | 3              |
| <i>T. orientale</i>        | 0         | 0         | 0          | 0         | 0           | 0            | 1         | 0        | 1         | 0        | 2              |
| <i>T. paratroviride</i>    | 1         | 0         | 0          | 0         | 0           | 0            | 0         | 0        | 0         | 0        | 1              |
| Non- identified            | 1         | 2         | 1          | 2         | 1           | 1            | 0         | 3        | 0         | 0        | 0              |
| <b>Total</b>               | <b>48</b> | <b>17</b> | <b>22</b>  | <b>27</b> | <b>6</b>    | <b>14</b>    | <b>13</b> | <b>8</b> | <b>11</b> | <b>9</b> | <b>175</b>     |

Table S2. Identification, origin, and isolation details of *Trichoderma* isolates

| Isolate ID | Taxa                      | District (Woreda) | Zone      | Coffee Ecosystem |
|------------|---------------------------|-------------------|-----------|------------------|
| AU1        | <i>T. asperellum</i>      | Gera              | Jimma     | Semi forest      |
| AU2        | <i>T. hamatum</i>         | Gera              | Jimma     | Semi forest      |
| AU3        | <i>T. asperellum</i>      | Gera              | Jimma     | Semi forest      |
| AU4        | <i>T. citrinoviride</i>   | Gera              | Jimma     | Semi forest      |
| AU5        | <i>T. asperelloides</i>   | Gera              | Jimma     | Semi forest      |
| AU6        | <i>T. reesei</i>          | Melko             | Jimma     | Semi forest      |
| AU7        | <i>T. koningiopsis</i>    | Gera              | Jimma     | Semi forest      |
| AU8        | <i>T. asperellum</i>      | Gera              | Jimma     | Semi forest      |
| AU9        | <i>T. longibrachiatum</i> | Yeki              | Jimma     | Semi forest      |
| AU10       | <i>T. aethiopicum</i>     | Gera              | Jimma     | Semi forest      |
| AU11       | <i>T. asperelloides</i>   | Gera              | Jimma     | Semi forest      |
| AU12       | <i>T. aethiopicum</i>     | Gera              | Jimma     | Semi forest      |
| AU13       | <i>T. asperellum</i>      | Gera              | Jimma     | Semi forest      |
| AU14       | <i>T. longibrachiatum</i> | Yeki              | Shaka     | Semi forest      |
| AU15       | <i>T. asperellum</i>      | Gera              | Jimma     | Semi forest      |
| AU16       | <i>T. harzianum</i>       | Gera              | Jimma     | Semi forest      |
| AU17       | <i>T. asperellum</i>      | Gera              | Jimma     | Semi forest      |
| AU18       | <i>T. asperellum</i>      | Gera              | Jimma     | Semi forest      |
| AU19       | <i>T. citrinoviride</i>   | Gera              | Jimma     | Semi forest      |
| AU20       | <i>T. asperellum</i>      | Limmu Saka        | Jimma     | Semi forest      |
| AU21       | <i>T. asperellum</i>      | Gera              | Jimma     | Semi forest      |
| AU22       | <i>T. asperellum</i>      | Yeki              | Shaka     | Semi forest      |
| AU23       | <i>T. viride</i>          | Gera              | Jimma     | Semi forest      |
| AU24       | <i>T. orientale</i>       | Odo Shakiso       | West Guji | Garden Coffee    |
| AU25       | <i>T. asperellum</i>      | Odo Shakiso       | West Guji | Garden Coffee    |
| AU26       | <i>T. asperellum</i>      | Odo Shakiso       | West Guji | Garden Coffee    |
| AU27       | <i>T. asperellum</i>      | Odo Shakiso       | West Guji | Garden Coffee    |
| AU28       | <i>T. asperelloides</i>   | Gera              | Jimma     | Garden Coffee    |
| AU29       | <i>T. asperelloides</i>   | Gera              | Jimma     | Garden Coffee    |
| AU30       | <i>T. hamatum</i>         | Shebedino         | Sidama    | Garden Coffee    |

|      |                           |              |              |               |
|------|---------------------------|--------------|--------------|---------------|
| AU31 | <i>T. asperellum</i>      | Shebedino    | Sidama       | Garden Coffee |
| AU32 | <i>T. longibrachiatum</i> | Gera         | Jimma        | Garden Coffee |
| AU33 | <i>T. asperellum</i>      | Shebedino    | Sidama       | Garden Coffee |
| AU34 | <i>T. asperelloides</i>   | Yeki         | Shaka        | Forest        |
| AU35 | <i>T. asperellum</i>      | Yeki         | Shaka        | Forest        |
| AU36 | <i>T. longibrachiatum</i> | Melko        | Jimma        | Forest        |
| AU37 | <i>T. erinaceum</i>       | Gera         | Jimma        | Forest        |
| AU38 | <i>T. asperellum</i>      | Yeki         | Shaka        | Forest        |
| AU39 | <i>T. asperellum</i>      | Gimbo        | Kaffa        | Forest        |
| AU40 | <i>T. longibrachiatum</i> | Gomma        | Jimma        | Forest        |
| AU41 | <i>T. brevicompactum</i>  | Yeki         | Shaka        | Forest        |
| AU42 | <i>T. asperellum</i>      | Gomma        | Jimma        | Forest        |
| AU43 | <i>T. asperellum</i>      | Haru         | West Wollega | Forest        |
| AU44 | <i>T. asperellum</i>      | Gomma        | Jimma        | Forest        |
| AU45 | <i>T. asperelloides</i>   | Gomma        | Jimma        | Forest        |
| AU46 | <i>T. asperellum</i>      | Gomma        | Jimma        | Forest        |
| AU47 | <i>T. asperelloides</i>   | Chena        | Kaffa        | Forest        |
| AU48 | <i>T. koningiopsis</i>    | Yeki         | Shaka        | Forest        |
| AU49 | <i>T. longibrachiatum</i> | Andaracha    | Shaka        | Forest        |
| AU50 | <i>T. asperellum</i>      | Andaracha    | Shaka        | Forest        |
| AU51 | <i>T. hamatum</i>         | Andaracha    | Shaka        | Forest        |
| AU52 | <i>T. asperellum</i>      | Andaracha    | Shaka        | Forest        |
| AU53 | <i>T. asperellum</i>      | Andaracha    | Shaka        | Forest        |
| AU54 | <i>T. asperellum</i>      | Mena         | Jimma        | Semi forest   |
| AU55 | <i>T. asperelloides</i>   | Mena         | Jimma        | Semi forest   |
| AU56 | <i>Non identified</i>     | Gewata       | Kaffa        | Forest        |
| AU57 | <i>T. asperelloides</i>   | Mena         | Jimma        | Semi forest   |
| AU58 | <i>T. erinaceum</i>       | Gewata       | Kaffa        | Forest        |
| AU59 | <i>T. bissettii</i>       | Aleta Wondo  | Sidama       | Garden Coffee |
| AU60 | <i>T. longibrachiatum</i> | Aleta Wondo  | Sidama       | Garden Coffee |
| AU61 | <i>T. asperelloides</i>   | Gomma        | Kaffa        | Garden Coffee |
| AU62 | <i>T. asperellum</i>      | Jarso        | West Wollega | Garden Coffee |
| AU63 | <i>T. asperellum</i>      | Jarso        | West Wollega | Garden Coffee |
| AU64 | <i>Non identified</i>     | Yirga cheffe | Gedeo        | Garden Coffee |
| AU65 | <i>Non identified</i>     | Yirga cheffe | Gedeo        | Garden Coffee |
| AU66 | <i>Non identified</i>     | Yirga cheffe | Gedeo        | Garden Coffee |
| AU67 | <i>T. longibrachiatum</i> | Aleta Wondo  | Sidama       | Garden Coffee |
| AU68 | <i>T. asperellum</i>      | Yirga cheffe | Gedeo        | Garden Coffee |
| AU69 | <i>T. asperellum</i>      | Wonago       | Gedeo        | Garden Coffee |
| AU70 | <i>T. koningiopsis</i>    | Wonago       | Gedeo        | Garden Coffee |
| AU71 | <i>T. asperelloides</i>   | Yirga cheffe | Sidama       | Semi forest   |
| AU72 | <i>T. longibrachiatum</i> | Yirga cheffe | Gedeo        | Semi forest   |
| AU73 | <i>T. asperellum</i>      | Gewata       | Kaffa        | Semi forest   |
| AU74 | <i>T. asperellum</i>      | Aleta Wondo  | Sidama       | Semi forest   |
| AU75 | <i>T. asperellum</i>      | Dale         | Sidama       | Garden        |
| AU76 | <i>T. asperellum</i>      | Dale         | Sidama       | Garden        |
| AU77 | <i>T. orientale</i>       | Dale         | Sidama       | Garden        |
| AU78 | <i>T. harzianum</i>       | Gimbo        | Kaffa        | Forest        |
| AU79 | <i>T. viride</i>          | Gimbo        | Kaffa        | Forest        |
| AU80 | <i>T. asperellum</i>      | Haru         | West Wollega | Forest        |
| AU81 | <i>T. asperellum</i>      | Haru         | West Wollega | Forest        |
| AU82 | <i>T. asperellum</i>      | Sheko        | Benchi Maji  | Forest        |
| AU83 | <i>T. asperellum</i>      | Sheko        | Benchi Maji  | Forest        |
| AU84 | <i>T. harzianum</i>       | Sheko        | Benchi Maji  | Forest        |
| AU85 | <i>T. asperelloides</i>   | Sheko        | Benchi Maji  | Forest        |
| AU86 | <i>T. gamsii</i>          | Sheko        | Benchi Maji  | Forest        |

|       |                           |               |             |               |
|-------|---------------------------|---------------|-------------|---------------|
| AU87  | <i>T. harzianum</i>       | Gera          | Jimma       | Forest        |
| AU88  | <i>T. harzianum</i>       | Gera          | Jimma       | Forest        |
| AU89  | <i>T. asperelloides</i>   | Gera          | Jimma       | Semi forest   |
| AU90  | <i>T. viride</i>          | Chena         | Kaffa       | Forest        |
| AU91  | <i>T. asperellum</i>      | Chena         | Kaffa       | Forest        |
| AU92  | <i>T. brevicompactum</i>  | Chena         | Kaffa       | Forest        |
| AU93  | <i>T. reesei</i>          | Chena         | Kaffa       | Semi forest   |
| AU94  | <i>T. aethiopicum</i>     | Chena         | Kaffa       | Semi forest   |
| AU95  | <i>T. asperellum</i>      | Limmu Saka    | Jimma       | Semi forest   |
| AU96  | <i>T. asperellum</i>      | Limmu Saka    | Jimma       | Semi forest   |
| AU97  | <i>T. asperellum</i>      | Limmu Saka    | Jimma       | Garden Coffee |
| AU98  | <i>T. asperelloides</i>   | Limmu Saka    | Jimma       | Garden Coffee |
| AU99  | <i>T. asperelloides</i>   | Limmu Saka    | Jimma       | Garden Coffee |
| AU100 | <i>T. asperellum</i>      | Limmu Saka    | Jimma       | Garden Coffee |
| AU101 | <i>Non identified</i>     | Limmu Saka    | Jimma       | Semi forest   |
| AU102 | <i>T. hamatum</i>         | Yeki          | Shaka       | Semi forest   |
| AU103 | <i>T. asperelloides</i>   | Limmu Saka    | Jimma       | Semi forest   |
| AU104 | <i>T. asperellum</i>      | Geisha        | Kaffa       | Forest        |
| AU105 | <i>T. harzianum</i>       | Geisha        | Kaffa       | Forest        |
| AU106 | <i>T. aethiopicum</i>     | Geisha        | Kaffa       | Forest        |
| AU107 | <i>Non identified</i>     | Geisha        | Kaffa       | Forest        |
| AU108 | <i>T. asperelloides</i>   | Yeki          | Shaka       | Semi forest   |
| AU109 | <i>T. bissettii</i>       | Yeki          | Shaka       | Semi forest   |
| AU110 | <i>T. asperellum</i>      | Yeki          | Shaka       | Semi forest   |
| AU111 | <i>Non identified</i>     | Yeki          | Shaka       | Semi forest   |
| AU112 | <i>T. viride</i>          | Yeki          | Shaka       | Garden Coffee |
| AU113 | <i>T. asperellum</i>      | Yeki          | Shaka       | Garden Coffee |
| AU114 | <i>T. longibrachiatum</i> | Yeki          | Shaka       | Garden Coffee |
| AU115 | <i>T. asperellum</i>      | Yeki          | Shaka       | Garden Coffee |
| AU116 | <i>T. citrinoviride</i>   | Yeki          | Shaka       | Semi forest   |
| AU117 | <i>Non identified</i>     | Yeki          | Shaka       | Semi forest   |
| AU118 | <i>T. asperelloides</i>   | Limmu Saka    | Jimma       | Semi forest   |
| AU119 | <i>T. asperelloides</i>   | Yeki          | Shaka       | Semi forest   |
| AU120 | <i>T. asperelloides</i>   | Yeki          | Shaka       | Semi forest   |
| AU121 | <i>T. longibrachiatum</i> | Sheko         | Benchi Maji | Semi forest   |
| AU122 | <i>T. asperelloides</i>   | Yeki          | Shaka       | Semi forest   |
| AU123 | <i>T. paratroviride</i>   | Limmu Saka    | Jimma       | Semi forest   |
| AU124 | <i>T. asperelloides</i>   | Gera          | Jimma       | Semi forest   |
| AU125 | <i>T. longibrachiatum</i> | Yayu          | Buno Bedele | Forest        |
| AU126 | <i>T. asperellum</i>      | Yayu          | Buno Bedele | Forest        |
| AU127 | <i>Non identified</i>     | Yayu          | Buno Bedele | Forest        |
| AU128 | <i>T. asperellum</i>      | Yayu          | Buno Bedele | Forest        |
| AU129 | <i>T. asperellum</i>      | Yayu          | Buno Bedele | Forest        |
| AU130 | <i>T. asperellum</i>      | Uruga         | West Guji   | Garden Coffee |
| AU131 | <i>T. asperellum</i>      | Gera          | Jimma       | Forest Coffee |
| AU132 | <i>T. hamatum</i>         | Yirga cheffe  | Gedeo       | Garden Coffee |
| AU133 | <i>T. asperellum</i>      | Sheko         | Benchi Maji | Semi forest   |
| AU134 | <i>T. asperelloides</i>   | Sheko         | Benchi Maji | Semi forest   |
| AU135 | <i>T. asperelloides</i>   | Sheko         | Benchi Maji | Semi forest   |
| AU136 | <i>T. longibrachiatum</i> | Sheko         | Benchi Maji | Forest        |
| AU137 | <i>T. asperellum</i>      | Sheko         | Benchi Maji | Forest        |
| AU138 | <i>T. longibrachiatum</i> | Semien Benchi | Benchi Maji | semi forest   |
| AU139 | <i>T. asperellum</i>      | Semein Benchi | Benchi Maji | semi forest   |
| AU140 | <i>T. longibrachiatum</i> | Semein Benchi | Benchi Maji | semi forest   |
| AU141 | <i>T. longibrachiatum</i> | Semein Benchi | Benchi Maji | semi forest   |
| AU142 | <i>T. asperellum</i>      | Sheko         | Benchi Maji | semi forest   |

|       |                           |               |              |               |
|-------|---------------------------|---------------|--------------|---------------|
| AU143 | <i>T. longibrachiatum</i> | Sheko         | Benchi Maji  | semi forest   |
| AU144 | <i>T. asperelloides</i>   | Sheko         | Benchi Maji  | Forest        |
| AU145 | <i>T. reesei</i>          | Sheko         | Benchi Maji  | Forest        |
| AU146 | <i>T. asperelloides</i>   | Sheko         | Benchi Maji  | Forest        |
| AU147 | <i>Non identified</i>     | Sheko         | Benchi Maji  | Forest        |
| AU148 | <i>T. asperelloides</i>   | Haru          | West Wollega | Forest        |
| AU149 | <i>T. asperelloides</i>   | Haru          | West Wollega | Semi forest   |
| AU150 | <i>T. gamsii</i>          | Haru          | West Wollega | Semi forest   |
| AU151 | <i>Non identified</i>     | Haru          | West Wollega | Semi forest   |
| AU152 | <i>T. longibrachiatum</i> | Limmu Saka    | Jimma        | Semi forest   |
| AU153 | <i>T. asperellum</i>      | Delo Mena     | Bale         | Forest        |
| AU154 | <i>T. harzianum</i>       | Delo Mena     | Bale         | Forest        |
| AU155 | <i>T. asperelloides</i>   | Delo Mena     | Bale         | Forest        |
| AU156 | <i>T. asperelloides</i>   | Delo Mena     | Bale         | Forest        |
| AU157 | <i>T. aethiopicum</i>     | Berberere     | Bale         | Forest        |
| AU158 | <i>T. longibrachiatum</i> | Yeki          | Sheka        | Forest        |
| AU159 | <i>T. brevicompactum</i>  | Berberere     | Bale         | Forest        |
| AU160 | <i>T. gamsii</i>          | Berberere     | Bale         | Forest        |
| AU161 | <i>T. longibrachiatum</i> | Berberere     | Bale         | Forest        |
| AU162 | <i>T. asperelloides</i>   | Kercha        | West Guji    | Garden Coffee |
| AU163 | <i>T. asperellum</i>      | Jarso         | West Wollega | Semi forest   |
| AU164 | <i>T. longibrachiatum</i> | Jarso         | West Wollega | Semi forest   |
| AU165 | <i>T. asperellum</i>      | Aira Guliso   | West Wollega | Semi forest   |
| AU166 | <i>T. hamatum</i>         | Semein Benchi | Benchi Maji  | Semi forest   |
| AU167 | <i>T. bissettii</i>       | Bule Hora     | West Guji    | Garden Coffee |
| AU168 | <i>T. aethiopicum</i>     | Kercha        | West Guji    | Garden Coffee |
| AU169 | <i>T. asperellum</i>      | Kercha        | West Guji    | Garden Coffee |
| AU170 | <i>T. asperellum</i>      | Aira Guliso   | West Wollega | Garden Coffee |
| AU171 | <i>T. asperellum</i>      | Aira Guliso   | West Wollega | Garden Coffee |
| AU172 | <i>T. asperellum</i>      | Kercha        | West Guji    | Garden Coffee |
| AU173 | <i>T. longibrachiatum</i> | Bule Hora     | West Guji    | Garden Coffee |
| AU174 | <i>T. asperellum</i>      | Bule Hora     | West Guji    | Garden Coffee |
| AU175 | <i>T. asperelloides</i>   | Bedele        | Buno Bedele  | Forest        |
